# Supplementary material for: The Gut Microbiota Can Provide Viral Tolerance in the Honey Bee
Source: MDPI journal article supplement (doi:10.3390/microorganisms9040871), 2021-04-17
Supplement: s1 [file s1]

**Table S3.** Output of linear mixed effects models for the bacterial abundance of specific members of the bee gut microbiota (*G. apicola*, *F. perrara*, *S. alvi*, *B. apis*, *B. asteroides*, *Lactobacillus Firm-4*, *Lactobacillus Firm-5*) or universally all bacteria (16S). Listed are estimates, confidence intervals (CI) and associated p-values for the predictors in the models, random effects variances (between groups:  $\sigma^2$  and within-groups:  $\tau_{00}$ ), intraclass correlation coefficient (ICC), number of groups, number of observations, marginal and conditional R<sup>2</sup> as well as post-hoc tests (Westfall corrected) between predictor levels.

|                                                      | 16S           |               |        | <i>G. apicola</i> |                |        | <i>S. alvi</i> |                 |        | <i>B. asteroides</i> |               |        | <i>Firm4</i>  |               |        | <i>Firm5</i> |               |        | <i>F. perrara</i> |                |        | <i>B. apis</i> |                |        |
|------------------------------------------------------|---------------|---------------|--------|-------------------|----------------|--------|----------------|-----------------|--------|----------------------|---------------|--------|---------------|---------------|--------|--------------|---------------|--------|-------------------|----------------|--------|----------------|----------------|--------|
| Predictors                                           | Estimates     | CI            | p      | Estimates         | CI             | p      | Estimates      | CI              | p      | Estimates            | CI            | p      | Estimates     | CI            | p      | Estimates    | CI            | p      | Estimates         | CI             | p      | Estimates      | CI             | p      |
| (Intercept)                                          | 19.99         | 18.53 – 21.46 | <0.001 | 18.21             | 14.16 – 22.27  | <0.001 | 16.97          | 14.23 – 19.71   | <0.001 | 15.37                | 11.69 – 19.06 | <0.001 | 14.67         | 11.81 – 17.54 | <0.001 | 17.49        | 14.96 – 20.02 | <0.001 | 13.42             | 11.14 – 15.71  | <0.001 | 16.83          | 12.16 – 21.51  | <0.001 |
| colony                                               | Reference     |               |        | Reference         |                |        | Reference      |                 |        | Reference            |               |        | Reference     |               |        | Reference    |               |        | Reference         |                |        | Reference      |                |        |
| microbiota+                                          | -0.38         | -1.62 – 0.85  | 0.542  | -5.12             | -7.08 – -3.15  | <0.001 | 0.12           | -2.11 – 2.35    | 0.917  | -0.98                | -3.88 – 1.92  | 0.508  | -0.82         | -3.52 – 1.88  | 0.552  | 0.37         | -2.66 – 3.40  | 0.812  | 0.38              | -1.48 – 2.25   | 0.686  | -0.31          | -3.27 – 2.64   | 0.836  |
| microbiota-                                          | -2.19         | -3.43 – -0.96 | <0.001 | -8.13             | -10.10 – -6.17 | <0.001 | -12.77         | -15.00 – -10.54 | <0.001 | -5.79                | -8.69 – -2.88 | <0.001 | -6.10         | -8.80 – -3.40 | <0.001 | -4.01        | -7.04 – -0.98 | 0.009  | -9.48             | -11.34 – -7.61 | <0.001 | -11.92         | -14.88 – -8.96 | <0.001 |
| Random Effects                                       |               |               |        |                   |                |        |                |                 |        |                      |               |        |               |               |        |              |               |        |                   |                |        |                |                |        |
| σ <sup>2</sup>                                       | 1.72          |               |        | 4.88              |                |        | 5.58           |                 |        | 10.67                |               |        | 9.22          |               |        | 11.65        |               |        | 4.41              |                |        | 11.06          |                |        |
| τ <sub>00</sub>                                      | 0.53          | colony        |        | 7.15              | colony         |        | 2.01           | colony          |        | 4.02                 | colony        |        | 1.64          | colony        |        | 0.00         | colony        |        | 1.45              | colony         |        | 8.21           | colony         |        |
| ICC                                                  | 0.24          |               |        | 0.59              |                |        | 0.26           |                 |        | 0.27                 |               |        | 0.15          |               |        |              |               |        | 0.25              |                |        | 0.43           |                |        |
| N                                                    | 2             | colony        |        | 2                 | colony         |        | 2              | colony          |        | 2                    | colony        |        | 2             | colony        |        | 2            | colony        |        | 2                 | colony         |        | 2              | colony         |        |
| Observations                                         | 38            |               |        | 39                |                |        | 38             |                 |        | 39                   |               |        | 39            |               |        | 39           |               |        | 39                |                |        | 39             |                |        |
| Marginal R <sup>2</sup> / Conditional R <sup>2</sup> | 0.294 / 0.462 |               |        | 0.415 / 0.763     |                |        | 0.845 / 0.886  |                 |        | 0.310 / 0.499        |               |        | 0.414 / 0.502 |               |        | 0.280 / NA   |               |        | 0.801 / 0.850     |                |        | 0.638 / 0.792  |                |        |
| Post-hoc tests (Westfall corrected)                  |               |               |        |                   |                |        |                |                 |        |                      |               |        |               |               |        |              |               |        |                   |                |        |                |                |        |
| Comparison                                           | Estimates     | p             |        | Estimates         | p              |        | Estimates      | p               |        | Estimates            | p             |        | Estimates     | p             |        | Estimates    | p             |        | Estimates         | p              |        | Estimates      | p              |        |
| colony vs. microbiota+                               | -0.38         | 0.542         |        | -5.12             | <0.001         |        | 0.23           | 0.834           |        | -0.98                | 0.508         |        | -0.82         | 0.552         |        | 0.37         | 0.812         |        | 0.38              | 0.686          |        | -0.31          | 0.836          |        |
| colony vs. microbiota-                               | -2.19         | <0.001        |        | -8.13             | <0.001         |        | -13.34         | <0.001          |        | -5.79                | <0.001        |        | -6.10         | <0.001        |        | -4.01        | 0.010         |        | -9.48             | <0.001         |        | -11.92         | <0.001         |        |
| microbiota+ vs. microbiota-                          | -1.81         | <0.001        |        | -3.01             | <0.001         |        | -13.57         | <0.001          |        | -4.81                | <0.001        |        | -5.28         | <0.001        |        | -4.38        | 0.001         |        | -9.86             | <0.001         |        | -11.61         | <0.001         |        |
