# Supplementary material for: The Gut Microbiota Can Provide Viral Tolerance in the Honey Bee
Source: MDPI journal article supplement (doi:10.3390/microorganisms9040871), 2021-04-17
Supplement: s1 [file s1]

**Table S1.** Overview of the number of experimental bees at risk (alive), the cumulative number of dead bees and the cumulative number of censored bees at day 0, 6, 7, 11, 12, 30, and 31 of the experiment according to source colony, cage and experimental treatment.

| Colony | Cage | Treatment            | Number of bees at risk (alive) |     |     |     |     |     |     |     | Cumulative number of dead bees |    |    |    |    |     |     |   | Cumulative number of censored bees |     |     |     |     |     |  |  |
|--------|------|----------------------|--------------------------------|-----|-----|-----|-----|-----|-----|-----|--------------------------------|----|----|----|----|-----|-----|---|------------------------------------|-----|-----|-----|-----|-----|--|--|
|        |      |                      | Day                            | 0   | 6   | 7   | 11  | 12  | 30  | 31  | 0                              | 6  | 7  | 11 | 12 | 30  | 31  | 0 | 6                                  | 7   | 11  | 12  | 30  | 31  |  |  |
| C5.1   | C1   | microbiota+   virus- | 18                             | 18  | 15  | 15  | 12  | 6   | 6   | 0   | 0                              | 0  | 0  | 0  | 6  | 7   | 0   | 3 | 3                                  | 6   | 6   | 6   | 11  |     |  |  |
| C5.1   | C2   | microbiota+   virus- | 18                             | 17  | 14  | 14  | 11  | 8   | 8   | 0   | 1                              | 1  | 1  | 1  | 4  | 4   | 0   | 3 | 3                                  | 6   | 6   | 6   | 14  |     |  |  |
| C5.1   | C3   | microbiota+   virus- | 18                             | 18  | 15  | 15  | 12  | 10  | 10  | 0   | 0                              | 0  | 0  | 0  | 2  | 3   | 0   | 3 | 3                                  | 6   | 6   | 6   | 15  |     |  |  |
| C5.1   | C4   | microbiota+   virus- | 18                             | 18  | 14  | 14  | 11  | 10  | 10  | 0   | 1                              | 1  | 1  | 1  | 2  | 2   | 0   | 3 | 3                                  | 6   | 6   | 6   | 16  |     |  |  |
| CG1    | H1   | microbiota+   virus- | 18                             | 18  | 15  | 15  | 12  | 9   | 7   | 0   | 0                              | 0  | 0  | 0  | 3  | 6   | 0   | 3 | 3                                  | 6   | 6   | 8   | 12  |     |  |  |
| CG1    | H2   | microbiota+   virus- | 18                             | 18  | 15  | 15  | 12  | 10  | 9   | 0   | 0                              | 0  | 0  | 0  | 3  | 4   | 0   | 3 | 3                                  | 6   | 6   | 6   | 14  |     |  |  |
| CG1    | H3   | microbiota+   virus- | 18                             | 17  | 11  | 10  | 8   | 4   | 3   | 0   | 1                              | 1  | 2  | 2  | 7  | 7   | 0   | 6 | 6                                  | 8   | 8   | 8   | 11  |     |  |  |
| CG1    | H4   | microbiota+   virus- | 18                             | 18  | 14  | 14  | 11  | 6   | 6   | 0   | 0                              | 0  | 0  | 0  | 5  | 5   | 0   | 4 | 4                                  | 7   | 7   | 7   | 13  |     |  |  |
| C5.1   | D1   | microbiota+   virus+ | 18                             | 18  | 15  | 15  | 12  | 5   | 5   | 0   | 0                              | 0  | 0  | 0  | 7  | 8   | 0   | 3 | 3                                  | 6   | 6   | 6   | 10  |     |  |  |
| C5.1   | D2   | microbiota+   virus+ | 18                             | 16  | 13  | 12  | 10  | 3   | 1   | 0   | 2                              | 3  | 3  | 3  | 12 | 12  | 0   | 3 | 3                                  | 5   | 5   | 5   | 6   |     |  |  |
| C5.1   | D3   | microbiota+   virus+ | 18                             | 17  | 15  | 14  | 11  | 1   | 0   | 0   | 0                              | 0  | 1  | 1  | 12 | 12  | 0   | 3 | 3                                  | 6   | 6   | 6   | 6   |     |  |  |
| C5.1   | D4   | microbiota+   virus+ | 18                             | 18  | 14  | 14  | 11  | 6   | 6   | 0   | 1                              | 1  | 1  | 2  | 6  | 6   | 0   | 3 | 3                                  | 6   | 6   | 6   | 12  |     |  |  |
| CG1    | G1   | microbiota+   virus+ | 18                             | 18  | 15  | 15  | 12  | 2   | 1   | 0   | 0                              | 0  | 0  | 0  | 11 | 12  | 0   | 3 | 3                                  | 6   | 6   | 6   | 6   |     |  |  |
| CG1    | G2   | microbiota+   virus+ | 18                             | 18  | 15  | 15  | 12  | 1   | 1   | 0   | 0                              | 0  | 0  | 0  | 11 | 12  | 0   | 3 | 3                                  | 6   | 6   | 6   | 6   |     |  |  |
| CG1    | G3   | microbiota+   virus+ | 18                             | 18  | 15  | 14  | 11  | 1   | 1   | 0   | 0                              | 0  | 1  | 1  | 11 | 12  | 0   | 3 | 3                                  | 6   | 6   | 6   | 6   |     |  |  |
| CG1    | G4   | microbiota+   virus+ | 18                             | 18  | 14  | 14  | 11  | 2   | 2   | 0   | 0                              | 0  | 0  | 0  | 9  | 10  | 0   | 4 | 4                                  | 7   | 7   | 7   | 8   |     |  |  |
| C5.1   | A1   | microbiota-   virus- | 18                             | 17  | 14  | 12  | 10  | 6   | 6   | 0   | 1                              | 1  | 3  | 3  | 7  | 7   | 0   | 3 | 3                                  | 5   | 5   | 5   | 11  |     |  |  |
| C5.1   | A2   | microbiota-   virus- | 18                             | 16  | 12  | 12  | 10  | 3   | 2   | 0   | 2                              | 2  | 2  | 2  | 10 | 10  | 0   | 4 | 4                                  | 6   | 6   | 6   | 8   |     |  |  |
| C5.1   | A3   | microbiota-   virus- | 18                             | 18  | 15  | 14  | 11  | 8   | 8   | 0   | 0                              | 0  | 1  | 1  | 4  | 4   | 0   | 3 | 3                                  | 6   | 6   | 6   | 14  |     |  |  |
| C5.1   | A4   | microbiota-   virus- | 18                             | 17  | 14  | 14  | 11  | 11  | 11  | 0   | 1                              | 1  | 1  | 1  | 1  | 1   | 0   | 3 | 3                                  | 6   | 6   | 6   | 17  |     |  |  |
| CG1    | E1   | microbiota-   virus- | 18                             | 18  | 15  | 14  | 11  | 2   | 2   | 0   | 0                              | 0  | 1  | 1  | 10 | 10  | 0   | 3 | 3                                  | 6   | 6   | 6   | 8   |     |  |  |
| CG1    | E2   | microbiota-   virus- | 18                             | 18  | 15  | 15  | 12  | 3   | 3   | 0   | 0                              | 0  | 0  | 0  | 9  | 11  | 0   | 3 | 3                                  | 6   | 6   | 6   | 7   |     |  |  |
| CG1    | E3   | microbiota-   virus- | 18                             | 18  | 15  | 15  | 12  | 6   | 5   | 0   | 0                              | 0  | 0  | 0  | 7  | 11  | 0   | 3 | 3                                  | 6   | 6   | 6   | 7   |     |  |  |
| CG1    | E4   | microbiota-   virus- | 18                             | 18  | 15  | 14  | 11  | 7   | 7   | 0   | 0                              | 0  | 1  | 1  | 5  | 8   | 0   | 3 | 3                                  | 6   | 6   | 6   | 10  |     |  |  |
| C5.1   | B1   | microbiota-   virus+ | 18                             | 15  | 13  | 13  | 10  | 1   | 1   | 0   | 3                              | 3  | 3  | 4  | 12 | 12  | 0   | 2 | 2                                  | 5   | 5   | 5   | 6   |     |  |  |
| C5.1   | B2   | microbiota-   virus+ | 18                             | 18  | 15  | 13  | 10  | 0   | 0   | 0   | 0                              | 1  | 2  | 2  | 12 | 12  | 0   | 3 | 3                                  | 6   | 6   | 6   | 6   |     |  |  |
| C5.1   | B3   | microbiota-   virus+ | 18                             | 17  | 13  | 13  | 10  | 3   | 1   | 0   | 2                              | 2  | 3  | 4  | 12 | 12  | 0   | 3 | 3                                  | 5   | 5   | 5   | 6   |     |  |  |
| C5.1   | B4   | microbiota-   virus+ | 18                             | 17  | 14  | 12  | 10  | 2   | 1   | 0   | 1                              | 2  | 2  | 2  | 11 | 12  | 0   | 3 | 4                                  | 6   | 6   | 6   | 6   |     |  |  |
| CG1    | F1   | microbiota-   virus+ | 18                             | 18  | 15  | 14  | 11  | 0   | 0   | 0   | 0                              | 0  | 1  | 1  | 12 | 12  | 0   | 3 | 3                                  | 6   | 6   | 6   | 6   |     |  |  |
| CG2    | F2   | microbiota-   virus+ | 18                             | 18  | 15  | 14  | 1   | 0   | 0   | 0   | 0                              | 1  | 12 | 12 | 13 | 13  | 0   | 3 | 3                                  | 5   | 5   | 5   | 5   |     |  |  |
| CG1    | F3   | microbiota-   virus+ | 18                             | 18  | 15  | 15  | 12  | 2   | 2   | 0   | 0                              | 0  | 0  | 1  | 10 | 11  | 0   | 3 | 3                                  | 6   | 6   | 6   | 7   |     |  |  |
| CG1    | F4   | microbiota-   virus+ | 18                             | 18  | 15  | 15  | 11  | 1   | 1   | 0   | 0                              | 0  | 1  | 1  | 11 | 12  | 0   | 3 | 3                                  | 6   | 6   | 6   | 6   |     |  |  |
| Total  |      |                      |                                | 576 | 562 | 459 | 444 | 342 | 139 | 126 | 0                              | 16 | 20 | 43 | 47 | 257 | 280 | 0 | 101                                | 102 | 191 | 191 | 193 | 296 |  |  |
