# Supplementary material for: The Gut Microbiota Can Provide Viral Tolerance in the Honey Bee
Source: MDPI journal article supplement (doi:10.3390/microorganisms9040871), 2021-04-17
Supplement: s1 [file s1]

**Table S4.** Output of Cox mixed effects model with bee survival in the treatment groups microbiota presence (microbiota+, microbiota-), virus presence (virus+, virus-) and their interaction as fixed factor and source colony and cage as random factor. Given are the estimates ( $\beta$ ), the hazard ratio (Exp.  $\beta$ ) the standard error (s.e.), the z-value and the p-value compared with the baseline treatment level (microbiota+ | virus-). For random variables the standard deviation (s.d.) and the variance are given.

| parameters                              | coefficients |                  |                  |         |         |
|-----------------------------------------|--------------|------------------|------------------|---------|---------|
|                                         | $\beta$      | Exp. ( $\beta$ ) | s.e. ( $\beta$ ) | z-value | p-value |
| <b>fixed variable</b>                   |              |                  |                  |         |         |
| microbiota presence                     | 0.69         | 1.98             | 0.30             | 2.26    | 0.024   |
| virus presence                          | 1.40         | 4.05             | 0.30             | 4.71    | <0.001  |
| interaction microbiota * virus presence | -0.13        | 0.88             | 0.4              | -0.31   | 0.750   |
| <b>random variable</b>                  | s.d.         | variance         |                  |         |         |
| cage                                    | 0.439        | 0.193            |                  |         |         |
| colony                                  | 0.361        | 0.130            |                  |         |         |
