# Supplementary material for: The Gut Microbiota Can Provide Viral Tolerance in the Honey Bee
Source: MDPI journal article supplement (doi:10.3390/microorganisms9040871), 2021-04-17
Supplement: s1 [file s1]

**Table S5.** Output of linear mixed effects models of viral titre in either virus+ bees (groups: microbiota+|virus+ and microbiota-|virus+) or virus- bees (groups: microbiota+|virus- and microbiota-|virus-). Listed are estimates, confidence intervals (CI) and associated p-values for the predictors in the models, random effects variances (between groups:  $\sigma^2$  and within-groups:  $\tau_{00}$ ), intraclass correlation coefficient (ICC), number of groups , number of observations, marginal and conditional R<sup>2</sup>.

| <i>Predictors</i>                                       | <b>Virus titre in virus+ bees</b> |                                     |              | <b>Virus titre in virus- bees</b> |                         |          |
|---------------------------------------------------------|-----------------------------------|-------------------------------------|--------------|-----------------------------------|-------------------------|----------|
|                                                         | <i>Estimates</i>                  | <i>CI</i>                           | <i>p</i>     | <i>Estimates</i>                  | <i>CI</i>               | <i>p</i> |
| (Intercept)                                             | 51908285714.29                    | 12952952974.68 –<br>90863618453.89  | <b>0.009</b> | 16650.00                          | -44046.53 –<br>77346.53 | 0.591    |
| microbiota-virus+                                       | <i>Reference</i>                  |                                     |              |                                   |                         |          |
| microbiota+virus+                                       | 9366089285.71                     | -43975696905.79 –<br>62707875477.22 | 0.731        |                                   |                         |          |
| microbiota-virus-                                       |                                   |                                     |              | <i>Reference</i>                  |                         |          |
| microbiota+virus-                                       |                                   |                                     |              | 27991.25                          | -1671.02 –<br>57653.52  | 0.064    |
| <b>Random Effects</b>                                   |                                   |                                     |              |                                   |                         |          |
| $\sigma^2$                                              | 2765258235946428530628.00         |                                     |              | 916162810.00                      |                         |          |
| $\tau_{00}$                                             | 0.00 colony                       |                                     |              | 1689016121.45 colony              |                         |          |
| ICC                                                     |                                   |                                     |              | 0.65                              |                         |          |
| N                                                       | 2 colony                          |                                     |              | 2 colony                          |                         |          |
| Observations                                            | 15                                |                                     |              | 16                                |                         |          |
| Marginal R <sup>2</sup> /<br>Conditional R <sup>2</sup> | 0.008 / NA                        |                                     |              | 0.074 / 0.674                     |                         |          |
