# Supplementary material for: The Gut Microbiota Can Provide Viral Tolerance in the Honey Bee
Source: MDPI journal article supplement (doi:10.3390/microorganisms9040871), 2021-04-17
Supplement: s1 [file s1]

**Table S2.** Primers used in this study and standard curve characteristics.

| Target                        | Name             | Sequence 5'-3'                    | Application                                                              | Amplicon size | T <sub>m</sub> (°C) <sup>a</sup> | Reference                           | Standard curve             |                 |
|-------------------------------|------------------|-----------------------------------|--------------------------------------------------------------------------|---------------|----------------------------------|-------------------------------------|----------------------------|-----------------|
|                               |                  |                                   |                                                                          |               |                                  |                                     | Efficiency, R <sup>2</sup> | Slope,intercept |
| DWV-B                         | VDVq-R2a         | CTT CCT CAT TAA CTG AGT TGT TGT C | qPCR: viral detection and quantification                                 | 140 bp        | 62                               | McMahon et al. 2015 <sup>a</sup>    | 93%, 0.915                 | -3.502, 39.994  |
|                               | VDVq-F2          | TAT CTT CAT TAA AAC CGC CAG GCT   |                                                                          |               | 63                               |                                     |                            |                 |
| DWV-B                         | VDVq-F1a         | GAA AAC ATT TGG AAT TAG CAA CGA C | PCR: external DNA standard creation                                      | 338 bp        | 63                               | McMahon et al. 2015 <sup>a</sup>    |                            |                 |
|                               | DWVDV_7AR        | AAT CCG TGA ATA TAG TGT GAG G     |                                                                          |               | 58                               |                                     |                            |                 |
| DWV-A                         | DWVq-F2          | TGT CTT CAT TAA AGC CAC CTG GAA   | qPCR: viral detection                                                    | 338 bp        | 61                               | McMahon et al. 2015 <sup>a</sup>    |                            |                 |
|                               | DWVq-R2a         | TTT CCT CAT TAA CTG TGT CGT TGA T |                                                                          |               | 58                               |                                     |                            |                 |
| BQCV                          | BQCV-qF7893      | AGT GGC GGA GAT GTA TGC           | qPCR: viral detection                                                    | 294 bp        | 56                               | Locke et al. 2012 <sup>b</sup>      |                            |                 |
|                               | BQCV-qB8150      | GGA GGT GAA GTG GCT ATA TC        |                                                                          |               | 58                               |                                     |                            |                 |
| CBPV                          | CBPV1-qF1818     | CAA CCT GCC TCA ACA CAG           | qPCR: viral detection                                                    | 296 bp        | 56                               | Locke et al. 2012 <sup>b</sup>      |                            |                 |
|                               | CBPV1-qB2077     | AAT CTG GCA AGG TTG ACT GG        |                                                                          |               | 58                               |                                     |                            |                 |
| SBV                           | SBV-qB3461       | GCT CTA ACC TCG CAT CAA C         | qPCR: viral detection                                                    | 335 bp        | 57                               | Locke et al. 2012 <sup>b</sup>      |                            |                 |
|                               | SBV-qF3164       | TTG GAA CTA CGC ATT CTC TG        |                                                                          |               | 56                               |                                     |                            |                 |
| SBPV                          | SBPV-F3177       | GCG CTT TAG TTC AAT TGC C         | qPCR: viral detection                                                    | 226 bp        | 55                               | de Miranda et al. 2010 <sup>c</sup> |                            |                 |
|                               | SBPV-B3363       | ATT ATA GGA CGT GAA AAT ATA C     |                                                                          |               | 53                               |                                     |                            |                 |
| β-Actin                       | Am-Actin2-qF     | CGT GCC GAT AGT ATT CTT G         | qPCR: control viral detection and quantification/                        | 271 bp        | 55                               | Locke et al. 2012 <sup>b</sup>      |                            |                 |
|                               | Am-Actin2-qB     | CTT CGT CAC CAA CAT AGG           |                                                                          |               | 54                               |                                     |                            |                 |
| Lactobacillus Firm-4          | Lacto. Firm-4_F  | AGTCGAGCGCGGAAGTCA                | qPCR: microbiota abundance quantification/external DNA standard creation | 169 bp        | 61.6                             | Kesnerova et al., 2017 <sup>d</sup> | 103.4%, 0.944              | -3.243, 35.851  |
|                               | Lacto. Firm-4_R  | AGCCGTCTTTCAACCAGCACT             |                                                                          |               | 61.2                             |                                     |                            |                 |
| Lactobacillus Firm-5          | Lacto. Firm-5_F  | GCAACCTGCCCTWTAGCTTG              | qPCR: microbiota abundance quantification/external DNA standard creation | 118 bp        | 60.5                             | Kesnerova et al., 2017 <sup>d</sup> | 108.7%, 0.963              | -3.129, 35.761  |
|                               | Lacto. Firm-5_R  | GCCCATCCTKTAGTGACAGC              |                                                                          |               | 60.5-62.5                        |                                     |                            |                 |
| Gilliamella apicala           | prPE150          | CTT TGT TGC CAT CGG TTA GGC C     | qPCR: microbiota abundance quantification/external DNA standard creation | 160 bp        | 64.2                             | Engel P. et al. 2015 <sup>e</sup>   | 106.1%, 0.963              | -3.183, 35.821  |
|                               | prPE153          | CCG CTT GCT CTC GCG AGG           |                                                                          |               | 62.9                             |                                     |                            |                 |
| Frischella perrera            | Frisch.perrara_F | GGA AGT TAT GTG TGG GAT AAG C     | qPCR: microbiota abundance quantification/external DNA standard creation | 185 bp        | 60.1                             | Kesnerova et al., 2017 <sup>d</sup> | 100.5%, 0.976              | -3.309, 36.805  |
|                               | Frisch.perrara_R | CTA TTC TCA GGT TGA GCC CG        |                                                                          |               | 60.5                             |                                     |                            |                 |
| Bartonella apis               | Bart.apis_F      | GTG GGA ATC TAC CTA TTT CTA CG    | qPCR: microbiota abundance quantification/external DNA standard creation | 103 bp        | 60.9                             | Kesnerova et al., 2017 <sup>d</sup> | 107.3%, 0.971              | -3.160, 35.417  |
|                               | Bart.apis_R      | AAC GCG GGC TCA TCT ATC TC        |                                                                          |               | 60.5                             |                                     |                            |                 |
| Bifidobacterium asteroides    | Bifi.aster_F     | ATG CAA GTC GAA CGG GAT CC        | qPCR: microbiota abundance quantification/external DNA standard creation | 174 bp        | 60.5                             | Kesnerova et al., 2017 <sup>d</sup> | 95.6%, 0.987               | -3.432, 37.878  |
|                               | Bifi.aster_R     | CAT CCC ATR CCG GTA AAC CC        |                                                                          |               | 60.5-62.5                        |                                     |                            |                 |
| Snodgrassella alvi            | S.alvi_PE_F      | CTT AGA GAT AGG AGA GTG CC        | qPCR: microbiota abundance quantification/external DNA standard creation | 132 bp        | 60.1                             | Kesnerova et al., 2017 <sup>d</sup> | 98.9%, 0.965               | -3.348, 35.894  |
|                               | S.alvi_PE_R      | AAC TTA ATG ATG GCA ACT AA        |                                                                          |               | 60.1                             |                                     |                            |                 |
| Universal bacteria (16S rRNA) | U16SRT-F         | ACT CCT ACG GGA GGC AGC AGT       | qPCR: microbiota abundance quantification/external DNA standard creation | 180 bp        | 65                               | Clifford et al. 2012 <sup>f</sup>   | 104.1%, 0.967              | -3.227, 33.846  |
|                               | U16SRT-R         | TAT TAC CGC GGC TGC TGG C         |                                                                          |               | 62                               |                                     |                            |                 |

<sup>a</sup> McMahon, D.P., Furst, M.A., Caspar, J., Theodorou, P., Brown, M.J.F., and Paxton, R.J. (2015) A sting in the spit: widespread cross-infection of multiple RNA viruses across wild and managed bees. *Journal of Animal Ecology* **84**: 615-624.

<sup>b</sup> Locke, B., Forsgren, E., Fries, I., and de Miranda, J.R. (2012) Acaricide treatment affects viral dynamics in *Varroa destructor*-infested honey bee colonies via both host physiology and mite control. *Applied and Environmental Microbiology* **78**: 227-235.

<sup>c</sup> de Miranda, J.R., Dainat, B., Locke, B., Cordoni, G., Berthoud, H., Gauthier, L. et al. (2010) Genetic characterization of slow bee paralysis virus of the honeybee (*Apis mellifera* L.). *Journal of General Virology* **91**: 2524-2530.

<sup>d</sup> Kesnerova, L., Mars, R.A.T., Ellegaard, K.M., Troilo, M., Sauer, U., and Engel, P. (2017) Disentangling metabolic functions of bacteria in the honey bee gut. *PLoS Biology* **15**: e2003467.

<sup>e</sup> Engel, P., Bartlett, K.D., and Moran, N.A. (2015) The bacterium *Frischella perrera* causes scab formation in the gut of its honeybee host. *mBio* **6**: e00193-00115.

<sup>f</sup> Clifford, R.J., Milillo, M., Prestwood, J., Quintero, R., Zurawski, D.V., Kwak, Y.I. et al. (2012) Detection of bacterial 16S rRNA and identification of four clinically important bacteria by real-time PCR. *PLoS One* **7**: e48558.
